# Supplementary material for: Human 45,X Fibroblast Transcriptome Reveals Distinct Differentially Expressed Genes Including Long Noncoding RNAs Potentially Associated with the Pathophysiology of Turner Syndrome
Source: PLoS One. 2014 Jun 16;9(6):e100076. doi: 10.1371/journal.pone.0100076 (PMC4059722; doi:10.1371/journal.pone.0100076)
Supplement: Table S4 — DAVID analysis for the genes with >2 fold increased expression in either 45,X or 46,XX cells. (XLSX) [file pone.0100076.s004.xlsx]

## Sheet: Functional enrichment 
Functional enrichment analysis with High stringency option.
Annotation Cluster 1	Enrichment Score: 2.0956716840989147
Category	Term	Count	%	PValue	Genes
GOTERM_MF_FAT	GO:0070011~peptidase activity, acting on L-amino acid peptides	6	17.6471	0.00237052	PEG10, C1RL, SERPINB2, CPXM2, C1R, CTSC
GOTERM_MF_FAT	GO:0008233~peptidase activity	6	17.6471	0.00287822	PEG10, C1RL, SERPINB2, CPXM2, C1R, CTSC
GOTERM_MF_FAT	GO:0004175~endopeptidase activity	5	14.7059	0.00392458	PEG10, C1RL, SERPINB2, C1R, CTSC
GOTERM_BP_FAT	GO:0006508~proteolysis	5	14.7059	0.154723	PEG10, C1RL, CPXM2, C1R, CTSC
Annotation Cluster 2	Enrichment Score: 1.4425262009445
Category	Term	Count	%	PValue	Genes
GOTERM_MF_FAT	GO:0004252~serine-type endopeptidase activity	3	8.82353	0.0300479	C1RL, SERPINB2, C1R
GOTERM_MF_FAT	GO:0008236~serine-type peptidase activity	3	8.82353	0.0391651	C1RL, SERPINB2, C1R
GOTERM_MF_FAT	GO:0017171~serine hydrolase activity	3	8.82353	0.0399676	C1RL, SERPINB2, C1R
Annotation Cluster 3	Enrichment Score: 1.0295780860044743
Category	Term	Count	%	PValue	Genes
SP_PIR_KEYWORDS	extracellular matrix	3	8.82353	0.0573129	POSTN, SPON2, ECM1
GOTERM_CC_FAT	GO:0005578~proteinaceous extracellular matrix	3	8.82353	0.112089	POSTN, SPON2, ECM1
GOTERM_CC_FAT	GO:0031012~extracellular matrix	3	8.82353	0.126896	POSTN, SPON2, ECM1
Annotation Cluster 4	Enrichment Score: 0.8061736404877741
Category	Term	Count	%	PValue	Genes
GOTERM_BP_FAT	GO:0048584~positive regulation of response to stimulus	3	8.82353	0.0799978	IL8, C1RL, C1R
GOTERM_BP_FAT	GO:0006954~inflammatory response	3	8.82353	0.136557	IL8, C1RL, C1R
GOTERM_BP_FAT	GO:0006952~defense response	3	8.82353	0.34921	IL8, C1RL, C1R
Annotation Cluster 5	Enrichment Score: 0.5146389657216077
Category	Term	Count	%	PValue	Genes
SP_PIR_KEYWORDS	Apoptosis	3	8.82353	0.125129	PEG10, UNC5B, TRIB3
GOTERM_BP_FAT	GO:0006915~apoptosis	3	8.82353	0.339599	PEG10, UNC5B, TRIB3
GOTERM_BP_FAT	GO:0012501~programmed cell death	3	8.82353	0.346256	PEG10, UNC5B, TRIB3
GOTERM_BP_FAT	GO:0008219~cell death	3	8.82353	0.424375	PEG10, UNC5B, TRIB3
GOTERM_BP_FAT	GO:0016265~death	3	8.82353	0.427893	PEG10, UNC5B, TRIB3
Annotation Cluster 6	Enrichment Score: 0.36549232753786626
Category	Term	Count	%	PValue	Genes
GOTERM_MF_FAT	GO:0016564~transcription repressor activity	3	8.82353	0.106948	TBX2, LMCD1, TRIB3
GOTERM_MF_FAT	GO:0030528~transcription regulator activity	3	8.82353	0.766549	TBX2, LMCD1, TRIB3
GOTERM_BP_FAT	GO:0045449~regulation of transcription	3	8.82353	0.976813	TBX2, LMCD1, TRIB3
Annotation Cluster 7	Enrichment Score: 0.2310556878586894
Category	Term	Count	%	PValue	Genes
GOTERM_MF_FAT	GO:0043167~ion binding	9	26.4706	0.491879	PEG10, LMCD1, CPXM2, C1R, CTSC, LEPREL1, EDIL3, SPON2, MOXD1
GOTERM_MF_FAT	GO:0046872~metal ion binding	8	23.5294	0.636178	PEG10, LMCD1, CPXM2, C1R, LEPREL1, EDIL3, SPON2, MOXD1
GOTERM_MF_FAT	GO:0043169~cation binding	8	23.5294	0.647733	PEG10, LMCD1, CPXM2, C1R, LEPREL1, EDIL3, SPON2, MOXD1
Annotation Cluster 8	Enrichment Score: 0.06652338400639277
Category	Term	Count	%	PValue	Genes
UP_SEQ_FEATURE	topological domain:Extracellular	5	14.7059	0.661371	CD9, UNC5B, EFNB2, GPR56, LRRC15
UP_SEQ_FEATURE	topological domain:Cytoplasmic	5	14.7059	0.822316	CD9, UNC5B, EFNB2, GPR56, LRRC15
UP_SEQ_FEATURE	transmembrane region	6	17.6471	0.929585	CD9, UNC5B, EFNB2, GPR56, LRRC15, MOXD1
SP_PIR_KEYWORDS	transmembrane	6	17.6471	0.932156	CD9, UNC5B, EFNB2, GPR56, LRRC15, MOXD1
GOTERM_CC_FAT	GO:0016021~integral to membrane	6	17.6471	0.986554	CD9, UNC5B, EFNB2, GPR56, LRRC15, MOXD1
Annotation Cluster 9	Enrichment Score: 0.05651990732210478
Category	Term	Count	%	PValue	Genes
GOTERM_MF_FAT	GO:0032553~ribonucleotide binding	3	8.82353	0.856626	MYO1D, TRIB3, RASD2
GOTERM_MF_FAT	GO:0032555~purine ribonucleotide binding	3	8.82353	0.856626	MYO1D, TRIB3, RASD2
GOTERM_MF_FAT	GO:0017076~purine nucleotide binding	3	8.82353	0.87402	MYO1D, TRIB3, RASD2
GOTERM_MF_FAT	GO:0000166~nucleotide binding	3	8.82353	0.926438	MYO1D, TRIB3, RASD2

## Sheet: GO analysis 
Gene ontology terms assosiated with set of genes (> 2 fold ) (P <0.05)
Category	Term	Count	%	PValue	Genes
GOTERM_BP_FAT	GO:0007155~cell adhesion	6	17.6471	0.0114302	CD9, GPR56, CPXM2, POSTN, EDIL3, SPON2
GOTERM_BP_FAT	GO:0022610~biological adhesion	6	17.6471	0.0114965	CD9, GPR56, CPXM2, POSTN, EDIL3, SPON2
GOTERM_BP_FAT	GO:0009611~response to wounding	5	14.7059	0.0199856	CD9, IL8, C1RL, SERPINB2, C1R
GOTERM_BP_FAT	GO:0006955~immune response	5	14.7059	0.0463231	IL8, C1RL, C1R, CTSC, SPON2
